# Supplementary material for: Dose–response relationship between physical activity and cardiometabolic risk in obese children and adolescents: A pre-post quasi-experimental study
Source: PubMed Central journal article supplement (PMC9892714; doi:10.3389/fphys.2023.1070653), 2023-01-19
Supplement: Image1.pdf [file Image1.pdf]

**Restricted cubic spline plot of MVPA and cardiometabolic risk indicators**

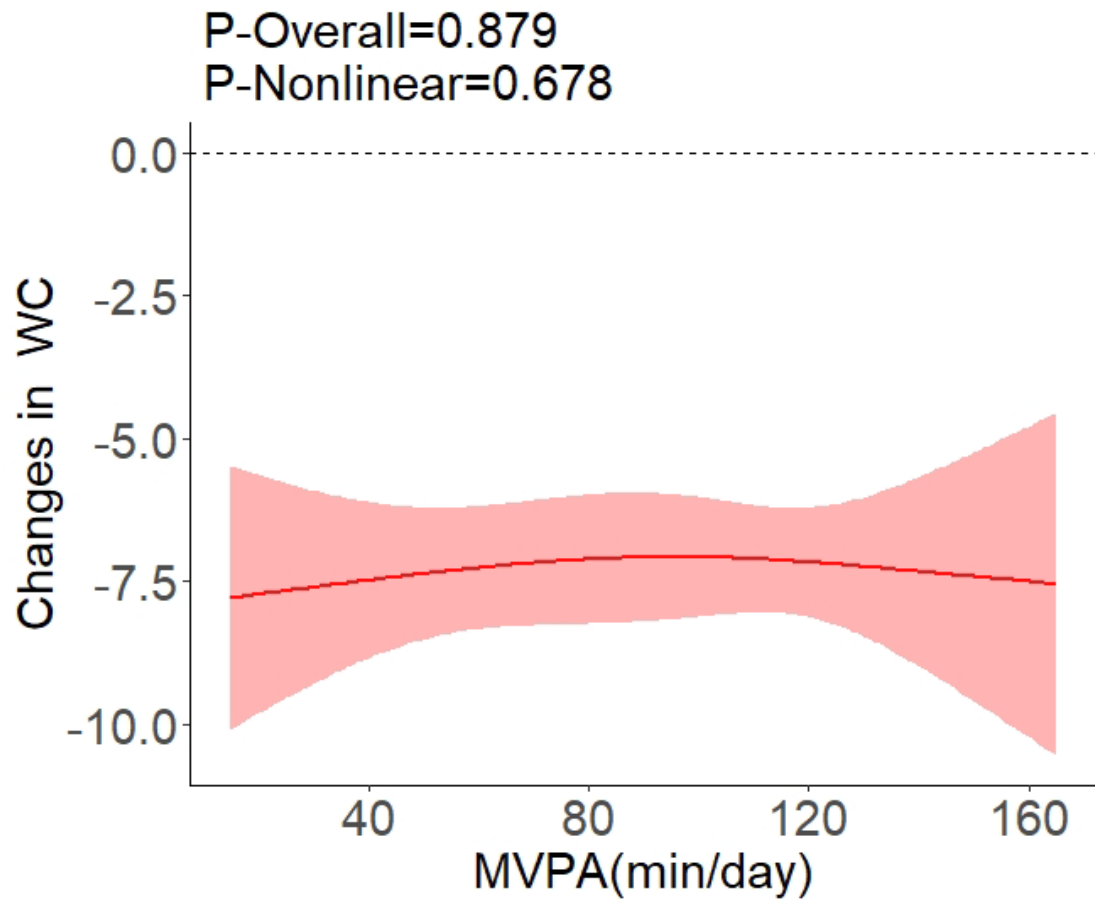

Figure S1 Restricted cubic spline plot of MVPA with changes in WC

P-Overall=0.535  
P-Nonlinear=0.302

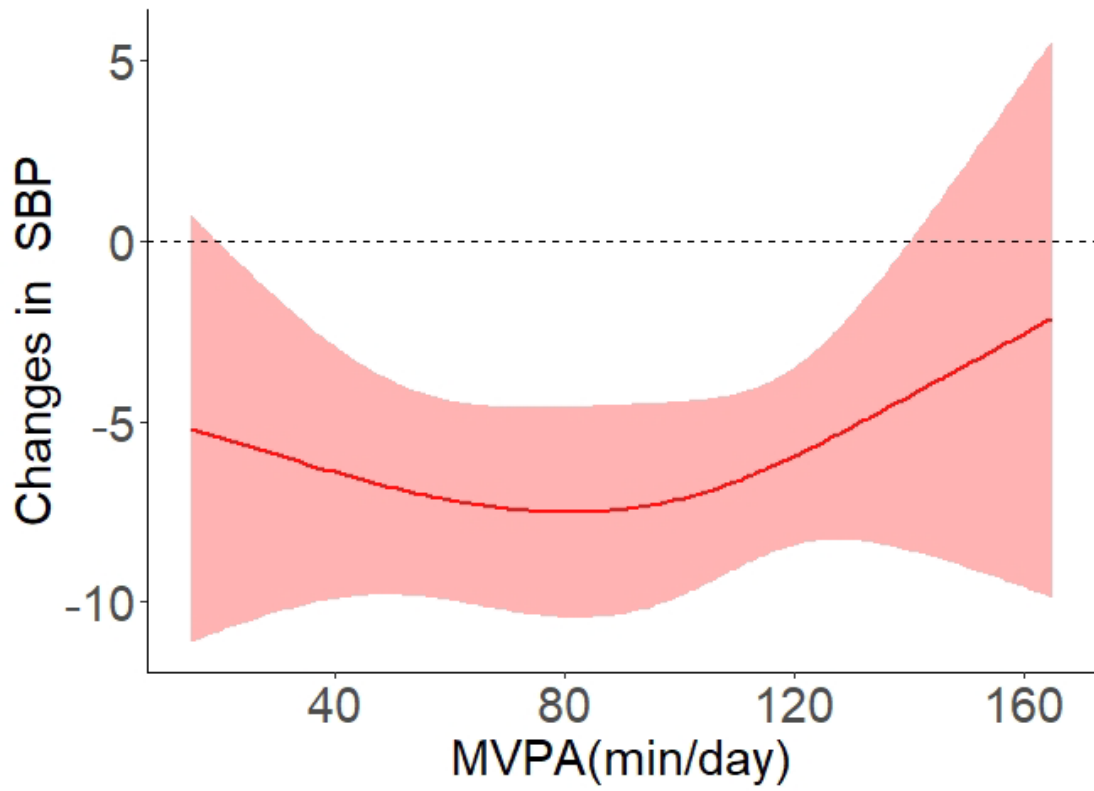

Figure S2 Restricted cubic spline plot of MVPA with changes in SBP

P-Overall=0.502  
P-Nonlinear=0.345

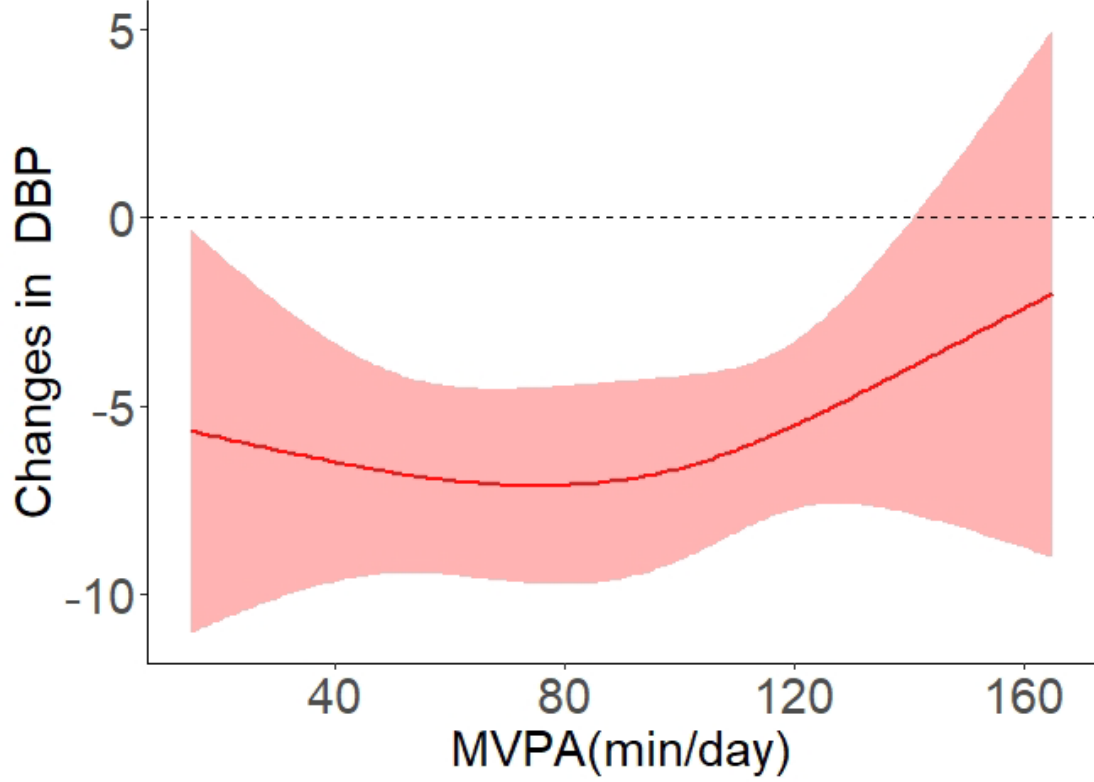

Figure S3 Restricted cubic spline plot of MVPA with changes in DBP

P-Overall=0.709  
P-Nonlinear=0.461

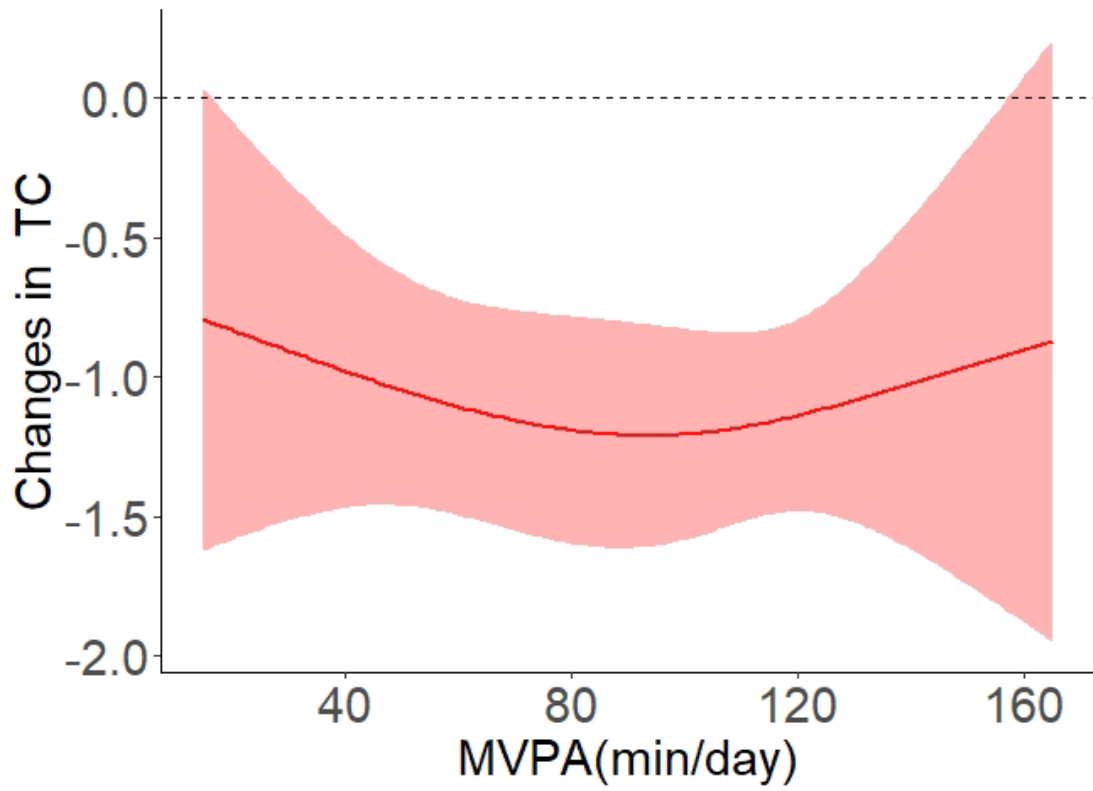

Figure S4 Restricted cubic spline plot of MVPA with changes in TC

P-Overall=0.892  
P-Nonlinear=0.954

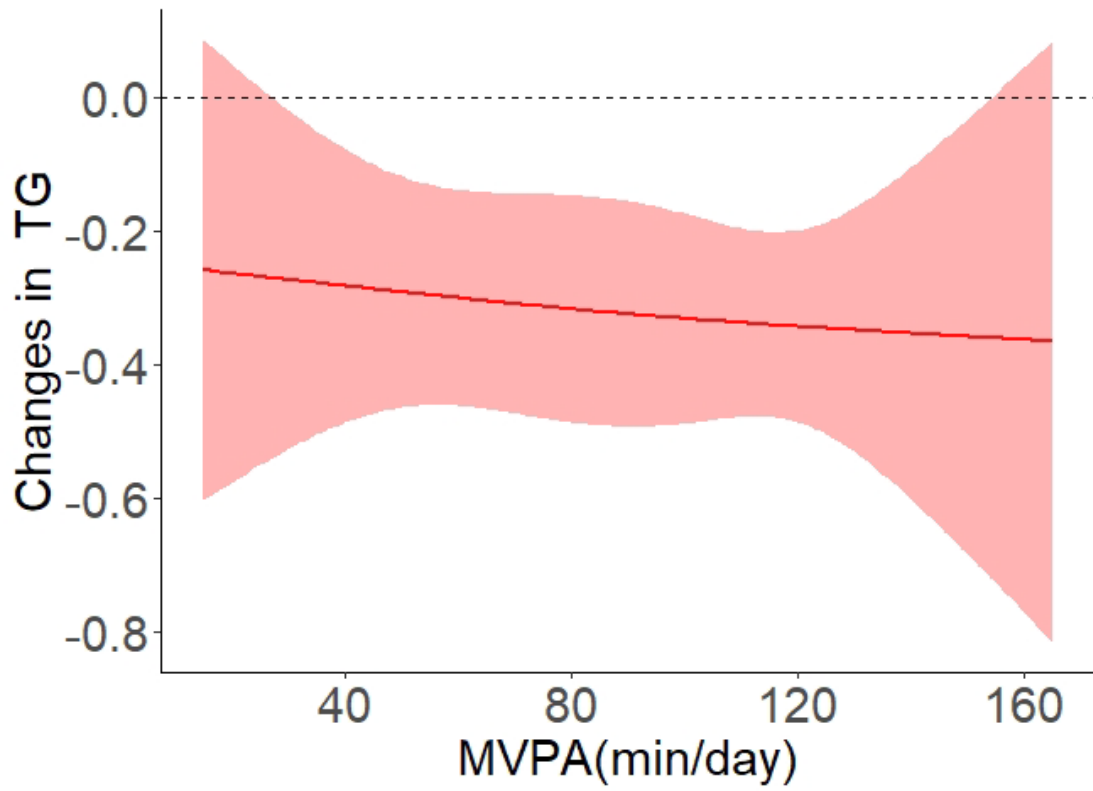

Figure S5 Restricted cubic spline plot of MVPA with changes in TG

P-Overall=0.446  
P-Nonlinear=0.268

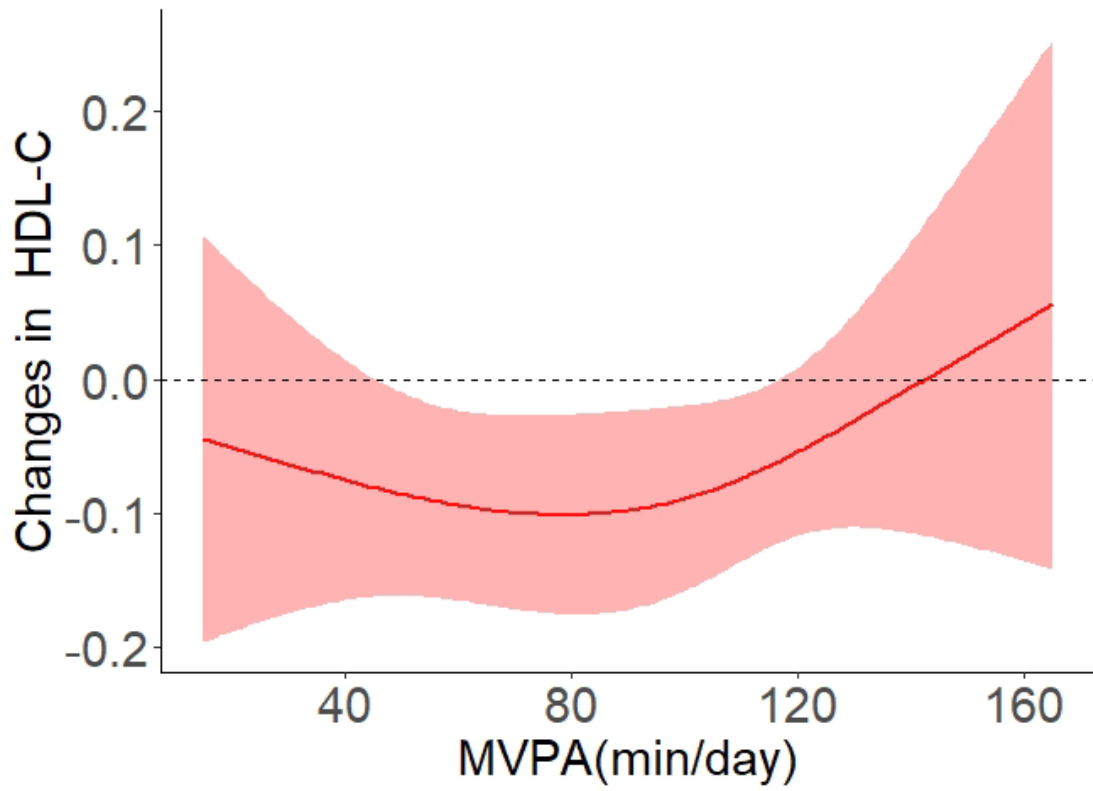

Figure S6 Restricted cubic spline plot of MVPA with changes in HDL-C

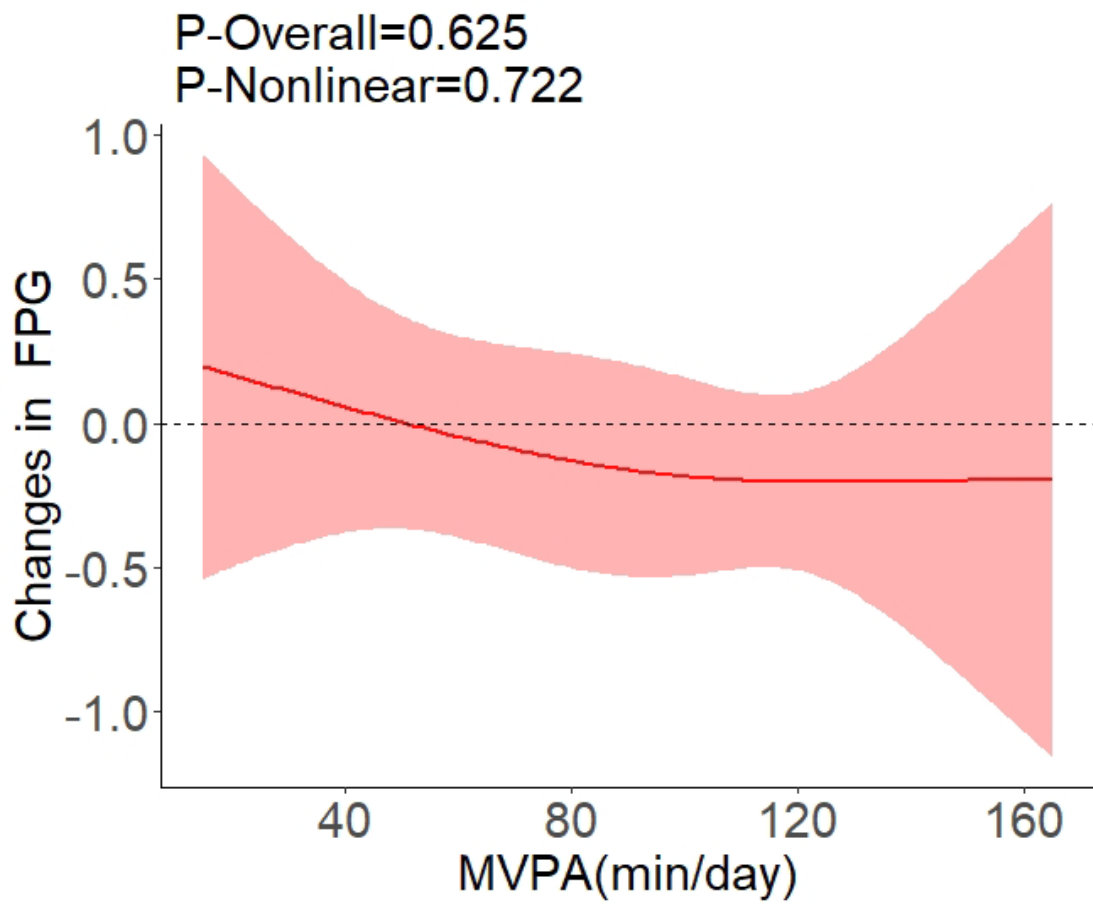

Figure S7 Restricted cubic spline plot of MVPA with changes in FPG

P-Overall=0.412  
P-Nonlinear=0.193

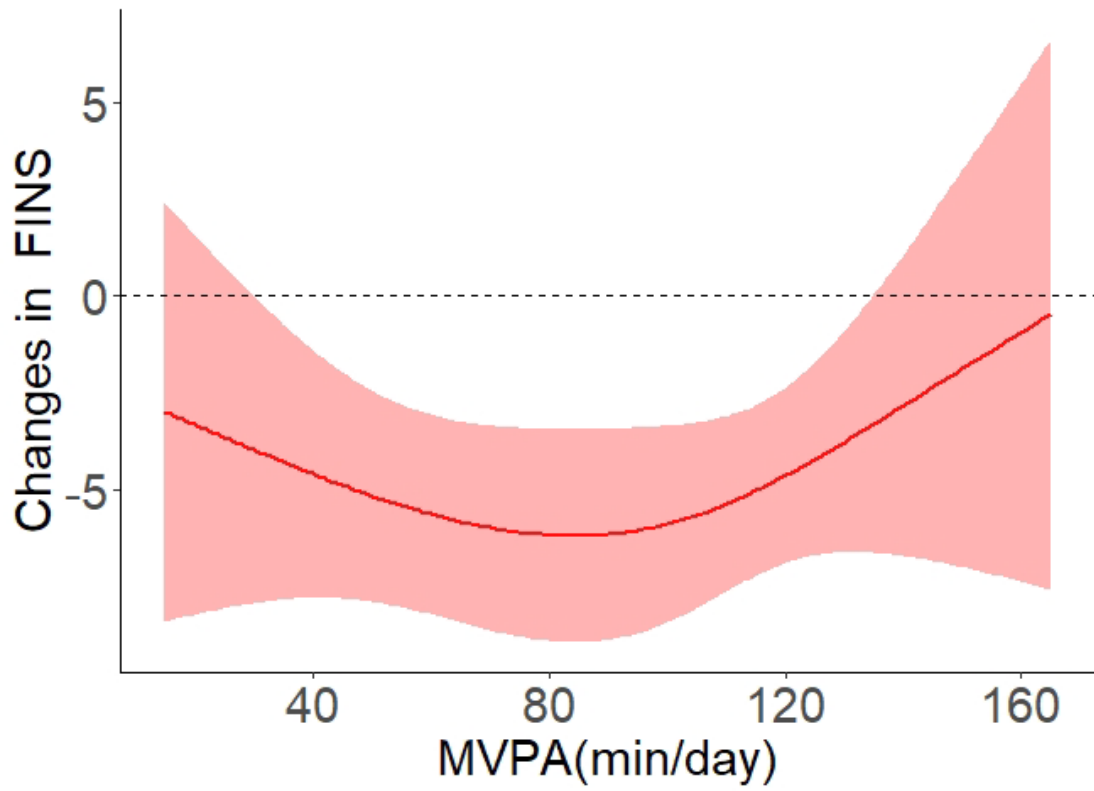

Figure S8 Restricted cubic spline plot of MVPA with changes in FINS



P-Overall=0.132  
P-Nonlinear<0.05

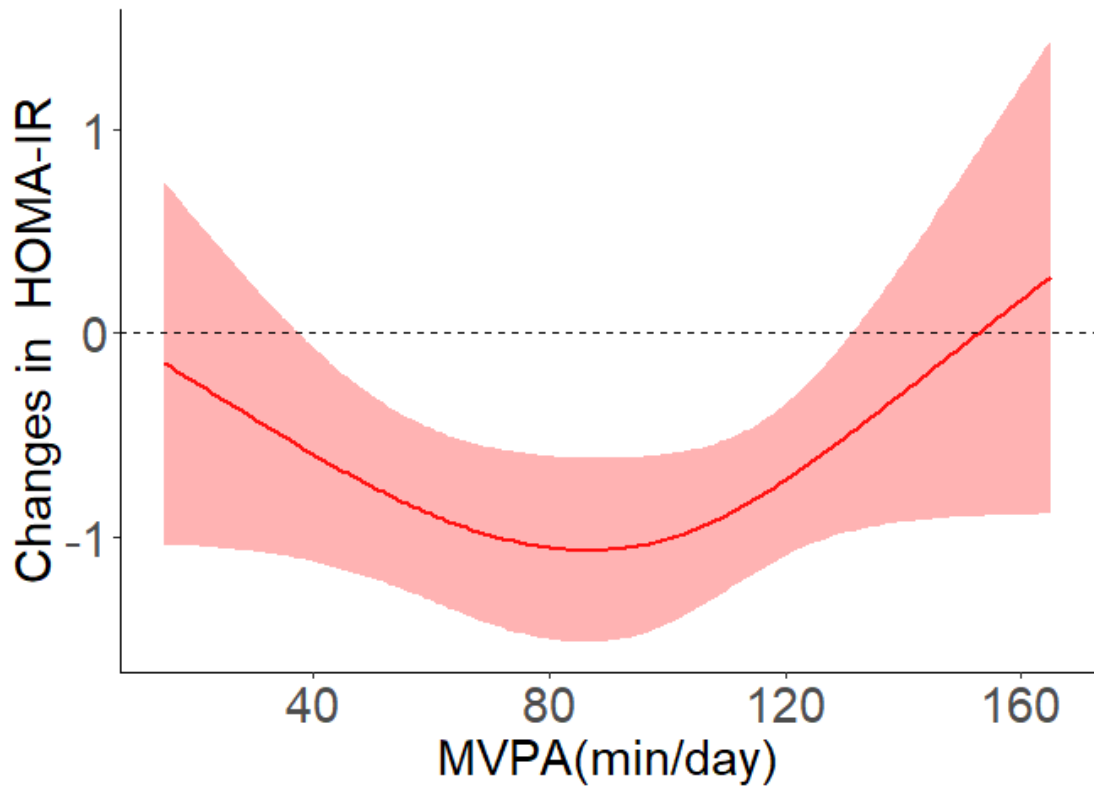

Figure S9 Restricted cubic spline plot of MVPA with changes in HOMA-IR
