# Supplementary material for: Dose–response relationship between physical activity and cardiometabolic risk in obese children and adolescents: A pre-post quasi-experimental study
Source: PubMed Central journal article supplement (PMC9892714; doi:10.3389/fphys.2023.1070653), 2023-01-19
Supplement: Table1.pdf [file Table1.pdf]

Table S1 Sex-specific BMI cut-offs for screening overweight and obesity among school-aged children and adolescents aged 6 to 18 years

The unit of measurement is Kg/m<sup>2</sup>

| Age<br>(year) | Boy        |         | Girl       |         |
|---------------|------------|---------|------------|---------|
|               | Overweight | Obesity | Overweight | Obesity |
| 6.0 ~         | 16.4       | 17.7    | 16.2       | 17.5    |
| 6.5 ~         | 16.7       | 18.1    | 16.5       | 18.0    |
| 7.0 ~         | 17.0       | 18.7    | 16.8       | 18.5    |
| 7.5 ~         | 17.4       | 19.2    | 17.2       | 19.0    |
| 8.0 ~         | 17.8       | 19.7    | 17.6       | 19.4    |
| 8.5 ~         | 18.1       | 20.3    | 18.1       | 19.9    |
| 9.0 ~         | 18.5       | 20.8    | 18.5       | 20.4    |
| 9.5 ~         | 18.9       | 21.4    | 19.0       | 21.0    |
| 10.0 ~        | 19.2       | 21.9    | 19.5       | 21.5    |
| 10.5 ~        | 19.6       | 22.5    | 20.0       | 22.1    |
| 11.0 ~        | 19.9       | 23.0    | 20.5       | 22.7    |
| 11.5 ~        | 20.3       | 23.6    | 21.1       | 23.3    |
| 12.0 ~        | 20.7       | 24.1    | 21.5       | 23.9    |
| 12.5 ~        | 21.0       | 24.7    | 21.9       | 24.5    |
| 13.0 ~        | 21.4       | 25.2    | 22.2       | 25.0    |
| 13.5 ~        | 21.9       | 25.7    | 22.6       | 25.6    |
| 14.0 ~        | 22.3       | 26.1    | 22.8       | 25.9    |
| 14.5 ~        | 22.6       | 26.4    | 23.0       | 26.3    |
| 15.0 ~        | 22.9       | 26.6    | 23.2       | 26.6    |
| 15.5 ~        | 23.1       | 26.9    | 23.4       | 26.9    |
| 16.0 ~        | 23.3       | 27.1    | 23.6       | 27.1    |
| 16.5 ~        | 23.5       | 27.4    | 23.7       | 27.4    |
| 17.0 ~        | 23.7       | 27.6    | 23.8       | 27.6    |
| 17.5 ~        | 23.8       | 27.8    | 23.9       | 27.8    |
| 18.0 ~        | 24.0       | 28.0    | 24.0       | 28.0    |
